# Supplementary material for: Facial Identification at a Virtual Reality Airport
Source: Iperception. 2019 Jul 12;10(4):2041669519863077. doi: 10.1177/2041669519863077 (PMC6628534; doi:10.1177/2041669519863077)
Supplement: Supplemental material for Facial Identification at a Virtual Reality Airport [file Supplemental_Material.xlsx]

## Sheet: Experiment 1
EXPERIMENT 1
PARTICIPANT	SAME-IMAGE MATCH %	DIFFERENT-IMAGE MATCH %	MISMATCH %
1	85	65	62.5
2	95	45	62.5
3	100	60	72.5
4	100	80	20
5	80	35	72.5
6	100	40	60
7	85	55	57.5
8	100	60	80
9	100	80	57.5
10	80	45	67.5
11	100	60	72.5
12	75	20	80
13	95	40	60
14	80	55	85
15	100	85	47.5
16	90	30	85
17	100	55	87.5
18	90	30	87.5
19	100	45	77.5
20	75	15	95
21	100	45	80
22	100	65	57.5
23	90	60	77.5
24	100	45	62.5
25	95	70	60
26	80	35	60
27	75	65	35
28	100	85	15
29	100	70	55
30	100	60	55

## Sheet: Experiment 2
EXPERIMENT 2
PARTICIPANT	MATCH %	MISMATCH %
1	67.5	57.5
2	62.5	65
3	62.5	75
4	95	27.5
5	72.5	32.5
6	77.5	40
7	65	52.5
8	55	65
9	50	77.5
10	60	65
11	42.5	80
12	70	60
13	77.5	55
14	62.5	75
15	62.5	52.5
16	57.5	42.5
17	50	52.5
18	70	42.5
19	77.5	45
20	65	72.5
21	45	40
22	55	70
23	30	67.5
24	62.5	55
25	57.5	57.5
26	17.5	92.5
27	25	85
28	40	60
29	55	60
30	47.5	55

## Sheet: Experiment 3
EXPERIMENT 3
PARTICIPANT	AVATAR MATCH %	AVATAR MISMATCH %	PHOTO MATCH %	PHOTO MISMATCH %
1	75	40	95	90
2	60	60	80	80
3	50	55	90	90
4	30	80	60	100
5	70	50	80	100
6	75	35	95	85
7	70	50	95	75
8	80	60	90	85
9	45	70	55	80
10	85	65	95	85
11	65	40	80	65
12	60	60	85	85
13	85	60	100	95
14	80	40	100	100
15	20	85	70	100
16	70	70	95	95
17	50	40	65	100
18	95	25	100	80
19	75	80	80	80
20	55	85	90	100
21	85	50	90	85
22	65	65	70	95
23	75	40	100	70
24	100	40	95	65
25	50	50	75	80
26	75	50	85	80
27	95	50	85	85
28	55	50	65	95
29	50	65	75	90
30	40	70	55	95

## Sheet: Experiment 4
EXPERIMENT 4
PARTICIPANT	GFMT MATCH %	GFMT MISMATCH %	KFMT MATCH %	KFMT MISMATCH %	AVATAR MATCH %	AVATAR MISMATCH %
1	80	50	90	15	85	20
2	90	35	75	60	85	25
3	85	40	70	55	75	35
4	80	65	45	55	80	20
5	85	40	70	50	85	50
6	95	35	85	55	75	55
7	60	70	45	60	40	70
8	60	90	55	55	45	60
9	70	70	35	60	60	20
10	75	65	55	70	45	55
11	60	85	50	75	70	45
12	65	85	55	80	60	55
13	60	100	70	70	50	70
14	70	85	55	80	60	60
15	65	70	50	45	80	45
16	70	75	75	85	50	70
17	65	70	65	55	70	70
18	70	65	70	45	65	50
19	90	90	60	65	70	60
20	80	70	85	60	60	60
21	75	85	70	60	80	70
22	65	90	75	40	90	60
23	95	70	65	60	75	45
24	90	95	75	55	70	60
25	95	85	85	55	60	45
26	100	95	70	60	70	90
27	95	75	80	40	70	45
28	80	70	80	60	85	50
29	90	50	85	60	75	50
30	100	85	90	85	75	65

## Sheet: Experiment 5
EXPERIMENT 5
PARTICIPANT	GFMT MATCH %	GFMT MISMATCH %	KFMT MATCH %	KFMT MISMATCH %	AVATAR MATCH %	AVATAR MISMATCH %
1	75	100	40	85	10	90
2	70	100	25	95	30	70
3	60	90	55	65	30	70
4	85	100	35	80	45	65
5	80	100	50	85	35	65
6	90	95	50	65	25	50
7	85	55	40	90	50	60
8	85	100	45	90	50	65
9	90	95	50	60	40	60
10	80	100	70	85	40	60
11	80	75	45	65	65	60
12	95	60	60	80	40	40
13	85	50	90	40	35	30
14	85	50	55	55	75	25
15	85	85	65	60	65	65
16	95	90	70	75	55	45
17	95	50	60	45	70	40
18	100	75	55	55	70	40
19	90	35	90	60	50	35
20	100	75	90	85	45	55
21	100	35	80	45	60	45
22	95	95	90	60	55	70
23	100	65	80	55	65	30
24	100	55	75	75	75	55
25	85	50	85	50	80	35
26	100	60	85	45	70	55
27	100	15	75	65	80	40
28	95	65	95	75	65	55
29	95	80	95	60	70	35
30	100	80	95	65	70	55

## Sheet: Experiment 6
EXPERIMENT 6
PARTICIPANT	MATCH %	MISMATCH %
1	70	25
2	50	35
3	40	55
4	30	50
5	65	25
6	50	35
7	45	55
8	65	50
9	65	30
10	55	25
11	65	45
12	65	40
13	55	20
14	40	60
15	65	35
16	65	40
17	70	55
18	60	35
19	60	45
20	70	50
21	55	55
22	55	50
23	85	15
24	75	30
25	65	30
26	85	45
27	40	30
28	50	45
29	70	25
30	50	40

## Sheet: Experiment 7
EXPERIMENT 7
PARTICIPANT	MATCH %	MISMATCH %
1	85	40
2	65	55
3	80	25
4	65	55
5	95	50
6	45	55
7	90	30
8	75	30
9	60	55
10	65	55
11	75	40
12	75	50
13	85	25
14	95	30
15	95	35
16	85	65
17	90	45
18	70	50
19	90	50
20	70	65
21	85	45
22	95	45
23	85	45
24	70	75
25	55	65
26	75	40
27	75	60
28	70	60
29	80	55
30	75	50

## Sheet: Avatar Item Data
AVATAR ITEM DATA
TRIAL TYPE	STIMULI	EXPERIMENT 1	EXPERIMENT 2	EXPERIMENT 3	EXPERIMENT 4	EXPERIMENT 5	EXPERIMENT 6	EXPERIMENT 7
MATCH	F001A_F001B	50	50	60	60	43.3333	66.6667	90
MATCH	F006A_F006B	86.6667	83.3333	73.3333	83.3333	43.3333	53.3333	76.6667
MATCH	F020A_F020B	93.3333	76.6667	90	86.6667	90	93.3333	96.6667
MATCH	F033A_F033B	70	53.3333	56.6667	50	63.3333	66.6667	83.3333
MATCH	F034A_F034B	30	38.3333	60	56.6667	40	60	90
MATCH	F041A_F041B	63.3333	61.6667	60	60	50	80	73.3333
MATCH	F042A_F042B	76.6667	83.3333	66.6667	80	73.3333	53.3333	90
MATCH	F059A_F059B	70	80	80	93.3333	40	40	63.3333
MATCH	F061A_F061B	10	21.6667	46.6667	56.6667	43.3333	70	86.6667
MATCH	F084A_F084B	50	68.3333	73.3333	86.6667	70	93.3333	93.3333
MATCH	M012A_M012B	60	56.6667	83.3333	86.6667	90	63.3333	86.6667
MATCH	M128A_M128B	73.3333	71.6667	63.3333	50	40	66.6667	93.3333
MATCH	M201A_M201B	36.6667	38.3333	53.3333	60	70	50	56.6667
MATCH	M205A_M205B	13.3333	36.6667	43.3333	40	23.3333	10	6.66667
MATCH	M209A_M209B	36.6667	53.3333	70	80	60	63.3333	80
MATCH	M212A_M212B	43.3333	61.6667	83.3333	70	50	46.6667	96.6667
MATCH	M223A_M223B	56.6667	68.3333	73.3333	83.3333	60	53.3333	90
MATCH	M227A_M227B	60	45	70	76.6667	43.3333	43.3333	56.6667
MATCH	M231A_M231B	30	40	56.6667	50	56.6667	53.3333	56.6667
MATCH	M235A_M235B	56.6667	70	60	63.3333	26.6667	60	80
MISMATCH	F004B_F086A	80	76.6667	60	70	70	23.3333	96.6667
MISMATCH	F005A_F087B	66.6667	75	56.6667	73.3333	80	76.6667	73.3333
MISMATCH	F007A_F015A	88.3333	76.6667	100	90	86.6667	83.3333	53.3333
MISMATCH	F013B_F052A	65	60	53.3333	56.6667	23.3333	30	10
MISMATCH	F026A_F040B	83.3333	86.6667	76.6667	83.3333	93.3333	50	80
MISMATCH	F030A_F039A	81.6667	76.6667	83.3333	70	56.6667	43.3333	36.6667
MISMATCH	F032B_F089A	56.6667	38.3333	30	40	40	16.6667	33.3333
MISMATCH	F035A_F047A	70	58.3333	76.6667	66.6667	46.6667	23.3333	63.3333
MISMATCH	F045A_F072A	85	85	70	63.3333	96.6667	40	66.6667
MISMATCH	F053A_F076A	31.6667	23.3333	33.3333	36.6667	43.3333	33.3333	50
MISMATCH	M003A_M124A	53.3333	40	66.6667	46.6667	63.3333	46.6667	80
MISMATCH	M016A_M125A	66.6667	75	23.3333	26.6667	10	10	13.3333
MISMATCH	M200A_M203A	68.3333	61.6667	46.6667	33.3333	20	33.3333	43.3333
MISMATCH	M202A_M221A	51.6667	61.6667	26.6667	20	73.3333	33.3333	30
MISMATCH	M204A_M217A	45	31.6667	33.3333	36.6667	63.3333	33.3333	56.6667
MISMATCH	M206B_M214A	76.6667	58.3333	73.3333	56.6667	30	26.6667	33.3333
MISMATCH	M207A_M220B	45	43.3333	70	56.6667	60	53.3333	56.6667
MISMATCH	M211B_M232B	50	41.6667	33.3333	26.6667	16.6667	40	3.33333
MISMATCH	M219A_M224A	81.6667	78.3333	66.6667	70	56.6667	50	66.6667
MISMATCH	M228A_M234B	51.6667	36.6667	40	26.6667	13.3333	36.6667	17.2414
